# Supplementary material for: Simple hydrothermal synthesis of mesoporous spinel NiCo2O4nanoparticles and their catalytic behavior in CH3OH electro-oxidation and H2O2electro-reduction
Source: Royal Society of Chemistry journal article supplement (doi:10.1039/c3cy00590a), 2013-01-01
Supplement: c3cy00590a.pdf [file c3cy00590a.pdf]

## Electronic Supplementary Information

Simple hydrothermal synthesis of mesoporous spinel  $\text{NiCo}_2\text{O}_4$   
nanoparticles and their catalytic behavior in  $\text{CH}_3\text{OH}$   
electro-oxidation and  $\text{H}_2\text{O}_2$  electro-reduction

Rui Ding,<sup>\*a,b,c</sup> Li Qi,<sup>a</sup> Minjun Jia<sup>c</sup> and Hongyu Wang<sup>\*a</sup>

<sup>a</sup> *State Key Laboratory of Electroanalytical Chemistry, Changchun Institute of Applied Chemistry, Chinese Academy of Sciences, 5625 Renmin Street, Changchun 130022, China*

<sup>b</sup> *Graduate University of Chinese Academy of Sciences, Beijing 100039, China*

<sup>c</sup> *State Key Laboratory of Theoretical and Computational Chemistry, College of Chemistry, Jilin University, Changchun 130023, China*

---

\* Email addresses: dingrui@ciac.ac.cn; hongyuwang@ciac.ac.cn;  
Tel/Fax: +86 431 85262287;

**Table S1** The fitted values of EIS parameters of the NiCo<sub>2</sub>O<sub>4</sub> electrode  
for CH<sub>3</sub>OH electro-oxidation

| State  | Impedimetric parameters          |                                              |                                                                                |                                               |                                                                                 |                                                                                |                                   |           |           |                                 |                               |
|--------|----------------------------------|----------------------------------------------|--------------------------------------------------------------------------------|-----------------------------------------------|---------------------------------------------------------------------------------|--------------------------------------------------------------------------------|-----------------------------------|-----------|-----------|---------------------------------|-------------------------------|
|        | <i>L</i><br>(H cm <sup>2</sup> ) | <i>R<sub>e</sub></i><br>(Ω cm <sup>2</sup> ) | <i>Q1, Y<sub>0</sub></i><br>(Ω <sup>-1</sup> s <sup>n</sup> cm <sup>-2</sup> ) | <i>R<sub>ct</sub></i><br>(Ω cm <sup>2</sup> ) | <i>W, Y<sub>0</sub></i><br>(Ω <sup>-1</sup> s <sup>0.5</sup> cm <sup>-2</sup> ) | <i>Q2, Y<sub>0</sub></i><br>(Ω <sup>-1</sup> s <sup>n</sup> cm <sup>-2</sup> ) | <i>C</i><br>(F cm <sup>-2</sup> ) | <i>n1</i> | <i>n2</i> | <i>f<sub>knee</sub></i><br>(HZ) | <i>χ<sup>2</sup></i><br>(E-3) |
| Blank  | 7.2E-8                           | 0.38                                         | 0.0015                                                                         | 0.72                                          | 1.10                                                                            | 0.11                                                                           | –                                 | 0.82      | 0.90      | 37.6                            | 1.28                          |
| Fresh  | 5.2E-8                           | 0.26                                         | 0.0049                                                                         | 0.80                                          | 0.33                                                                            | 0.16                                                                           | –                                 | 0.75      | 0.94      | 31.5                            | 1.42                          |
| 1000th | –                                | 0.40                                         | 0.0045                                                                         | 0.91                                          | 0.35                                                                            | –                                                                              | 0.21                              | 0.75      | –         | 25.7                            | 0.76                          |

**Table S2** The fitted values of EIS parameters of the NiCo<sub>2</sub>O<sub>4</sub> electrode  
 for H<sub>2</sub>O<sub>2</sub> electro-reduction

| State | Impedimetric parameters          |                                              |                                                                                |                                   |                                                                                 |                                                                                |                                   |           |           |                                 |                               |
|-------|----------------------------------|----------------------------------------------|--------------------------------------------------------------------------------|-----------------------------------|---------------------------------------------------------------------------------|--------------------------------------------------------------------------------|-----------------------------------|-----------|-----------|---------------------------------|-------------------------------|
|       | <i>L</i><br>(H cm <sup>2</sup> ) | <i>R<sub>e</sub></i><br>(Ω cm <sup>2</sup> ) | <i>Q1, Y<sub>0</sub></i><br>(Ω <sup>-1</sup> s <sup>n</sup> cm <sup>-2</sup> ) | <i>R1</i><br>(Ω cm <sup>2</sup> ) | <i>W, Y<sub>0</sub></i><br>(Ω <sup>-1</sup> s <sup>n</sup> cm <sup>-0.5</sup> ) | <i>Q2, Y<sub>0</sub></i><br>(Ω <sup>-1</sup> s <sup>n</sup> cm <sup>-2</sup> ) | <i>R2</i><br>(Ω cm <sup>2</sup> ) | <i>n1</i> | <i>n2</i> | <i>f<sub>knee</sub></i><br>(HZ) | <i>χ<sup>2</sup></i><br>(E-3) |
| Blank | 6.1E-8                           | 0.28                                         | 0.0050                                                                         | 0.65                              | 0.28                                                                            | 0.26                                                                           | –                                 | 0.78      | 1.0       | 46.5                            | 0.87                          |
| 0.1 M | 2.5E-8                           | 0.34                                         | 0.00039                                                                        | 1.0                               | 0.023                                                                           | 0.16                                                                           | 2.73                              | 1.0       | 0.76      | 25.7                            | 0.98                          |
| 0.3 M | 6.3E-8                           | 0.24                                         | 0.0032                                                                         | 0.79                              | –                                                                               | 0.16                                                                           | 1.76                              | 0.81      | 0.68      | 25.7                            | 1.0                           |
| 0.5 M | 6.8E-8                           | 0.22                                         | 0.0024                                                                         | 0.76                              | –                                                                               | 0.16                                                                           | 1.19                              | 0.85      | 0.68      | 25.7                            | 1.4                           |
| 0.7 M | 7.2E-8                           | 0.20                                         | 0.0024                                                                         | 0.87                              | –                                                                               | 0.16                                                                           | 1.12                              | 0.86      | 0.63      | 25.7                            | 0.41                          |
